# Supplementary material
Source: publisher site journal article supplement (https://www.dovepress.com/article/393282)

# Supplementary

## Supplementary Tables

| **Supplementary Table 1: Numerical Ranking of Novel Memory Scoring Example** | | | | |
| --- | --- | --- | --- | --- |
| **Person** | **Memory performance score** | **Levels of difficulty** | **Mistakes** | **Total time** |
| 1 | 100 | 35 | 2 | 88.419998 |
| 2 | 99 | 35 | 10 | 67.38999 |
| 3 | 98 | 35 | 13 | 129.49001 |
| 4 | 81 | 27 | 13 | 102.93 |
| 5 | 79 | 27 | 14 | 131.59 |
| 6 | 53 | 20 | 11 | 69.57 |
| 7 | 52 | 20 | 11 | 117.65 |
| 8 | 21 | 14 | 12 | 73.839996 |
| 9 | 18 | 14 | 17 | 266.29001 |
| 10 | 9 | 9 | 11 | 76.75 |
|  |  |  |  |  |

Supplementary Table 2: Post-hoc Analysis of Participants’ Characteristics

| **Factor** | **MetS vs No MetS (No risk factors) - p-value** | **MetS vs MetS (with 1-2 risk factors) -p-value** | **MetS (No risk factors) vs MetS (with 1-2 risk factors) – p-value** |
| --- | --- | --- | --- |
| Age | 0.0000 | 0.0010 | 0.0000 |
| BMI | 0.0000 | 0.0000 | 0.0000 |
| Gender | 0.3719 | 1.0000 | 0.1744 |
| Nationality | 0.1397 | 0.1573 | 0.9421 |
| Waist Circumference | 0.0000 | 0.0000 | 0.0000 |
| HbA1c | 0.0000 | 0.0000 | 0.0000 |
| Triglycerides | 0.0000 | 0.0000 | 0.0000 |
| HDL | 0.0000 | 0.0000 | 0.0000 |
| Blood pressure | 0.0000 | 0.0000 | 0.0000 |
| Physical Activity | 0.1124 | 0.0437 | 1.0000 |

Supplementary Table 3. Comparison of Memory Performance and Speed of Reaction Score by Component

| **Factor** | **N** | **Memory performance, median (IQR)** | **P-value** | **Speed of reaction score, median (IQR)** | **P-value** |
| --- | --- | --- | --- | --- | --- |
| Dysglycaemia |  |  |  |  |  |
| Yes | 528 | 43.3 (21.8, 70.5) |  | 99.7 (54.1, 213.4) |  |
| No | 472 | 57.6 (30.9, 78.3) | <0.001 | 83.8 (50.5, 165.1) | 0.012 |
| Low HDL |  |  |  |  |  |
| Yes | 318 | 49.8 (21.4, 77.0) |  | 96.1 (54.8, 190.3) |  |
| No | 682 | 50.3 (26.0, 74.5) | 0.79 | 89.1 (50.7, 173.4) | 0.12 |
| Raised blood pressure |  |  |  |  |  |
| Yes | 252 | 41.6 (19.0, 67.3) |  | 97.8 (54.4, 182.7) |  |
| No | 748 | 52.4 (27.7, 76.9) | <0.001 | 92.1 (51.8, 183.5) | 0.41 |
| Raised Triglycerides |  |  |  |  |  |
| Yes | 315 | 48.5 (26.0, 73.2) |  | 95.8 (51.0, 176.4) |  |
| No | 685 | 50.8 (24.5, 75.6) | 0.55 | 90.7 (52.6, 185.6) | 0.87 |
| Raised waist circumference |  |  |  |  |  |
| Yes | 397 | 42.0 (20.5, 66.9) |  | 115.2 (60.1, 235.7) |  |
| No | 603 | 54.8 (28.3, 78.4) | <0.001 | 82.8 (49.7, 156.1) | <0.001 |

*Adjusted for age, sex, income, physical activity, diet, cigarette, and shisha smoking.*

Supplementary Table 4. Association Between Metabolic Syndrome Components and Cognitive Dysfunction – Multivariable Logistic Regression

|  | **OR** | **95% CI** | **P-value** |
| --- | --- | --- | --- |
| **Model 1: Speed of reaction score (for MetS components)** | | | |
| Dysglycaemia | 1.38 | 0.98-1.95 | 0.064 |
| Raised waist circumference | 1.53 | 1.09 -2.15 | 0.015 |
| Raised blood pressure | 0.84 | 0.56-1.27 | 0.417 |
| Low HDL | 1.06 | 0.75 - 1.5 | 0.747 |
| Raised triglycerides | 1.07 | 0.74-1.56 | 0.702 |
| **Model 2: Memory performance score (for MetS components)** | | | |
| Dysglycaemia | 1.21 | 0.88-1.66 | 0.243 |
| Raised waist circumference | 1.17 | 0.85-1.62 | 0.97 |
| Raised blood pressure | 1.4 | 0.99-1.99 | 0.059 |
| Low HDL | 1.16 | 0.84-1.61 | 0.36 |
| Raised triglycerides | 0.97 | 0.69-1.36 | 0.844 |

*Adjusted for age, sex, income, physical activity, diet, education, cigarette, and shisha smoking.*

Supplementary Table 5: Association Between Metabolic Syndrome and Cognitive Dysfunction- Stratified Analysis Based on Level of Education

| **Below tertiary education group** | | | | **Tertiary education and above group** | | |
| --- | --- | --- | --- | --- | --- | --- |
|  | **OR** | **95% CI** | **P-value** | **OR** | **95% CI** | **P-value** |
| **Memory Performance Score** | | | |  | | |
| No MetS components | Ref |  |  |  |  |  |
| 1-2 MetS components | 2.00 | 0.89 -4.52 | 0.093 | 1.49 | 0.81 -2.76 | 0.202 |
| MetS | 2.52 | 1.08 -5.83 | 0.032 | 1.29 | 0.65 -2.59 | 0.461 |
| Constant (baseline odds) | 0.54 | 0.18- 1.59 | 0.264 | 0.49 | 0.22-1.14 | 0.100 |
| **Speed of Reaction Score** | | | |  | | |
| No MetS components | Ref |  |  |  |  |  |
| 1-2 MetS components | 2.08 | 0.88 -4.94 | 0.095 | 0.77 | 0.43-1.39 | 0.393 |
| MetS | 2.90 | 1.18 – 7.15 | 0.021 | 1.05 | 0.55-2.01 | 0.885 |
| Constant (baseline odds) | 0.48 | 0.13-1.69 | 0.253 | 0.18 | 0.42-0.64 | 0.001 |

*Adjusted for age, sex, income, physical activity, diet, cigarette, and shisha smoking,*

Supplementary figure 1. Comparison of memory performance by MetS components


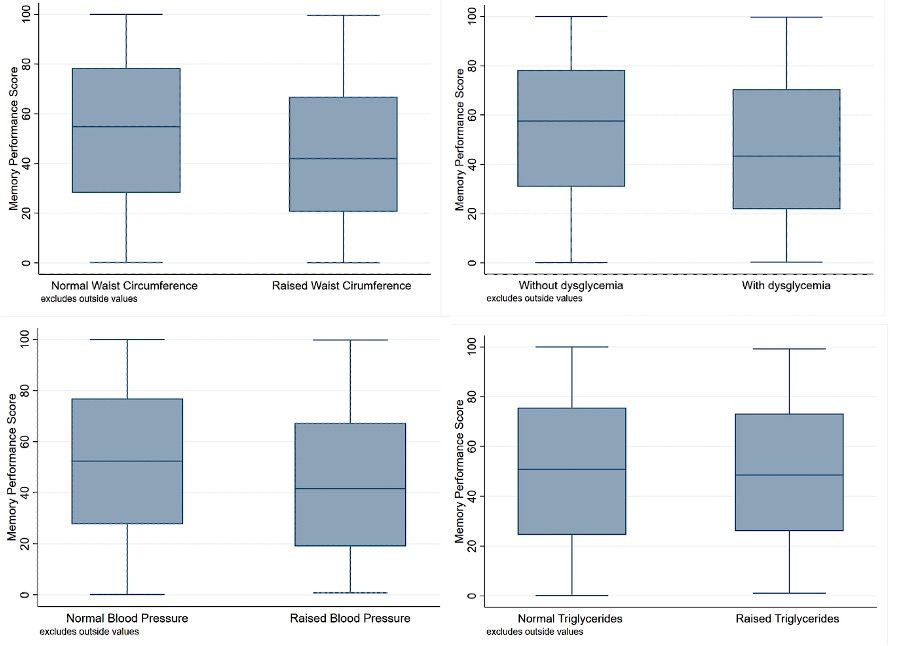


Supplementary figure 2. Comparison of speed of reaction score by MetS components


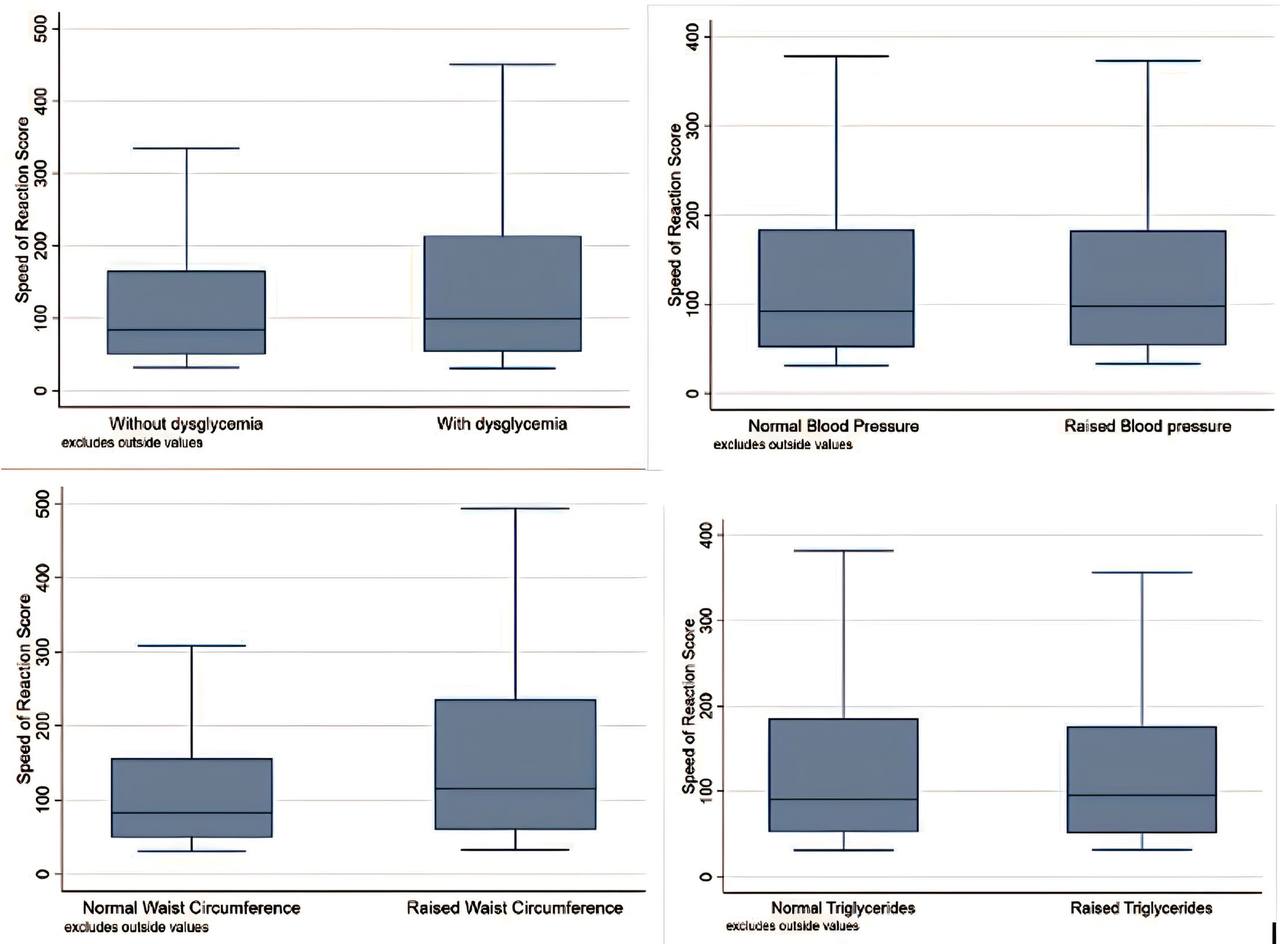

Supplement: Supplementary file 1 [file get_supplementary_file.php]
